# Supplementary material for: An ab initio study of the nickel-catalyzed transformation of amorphous carbon into graphene in rapid thermal processing
Source: Royal Society of Chemistry journal article supplement (doi:10.1039/c5nr08614k), 2016-01-01
Supplement: c5nr08614k1.pdf [file c5nr08614k1.pdf]

## Electronic Supplementary Information

### **Ab initio study of nickel-catalyzed transformation of amorphous carbon into graphene in rapid thermal processing**

Shuang Chen,<sup>ab</sup> Wei Xiong,<sup>c</sup> Yun Shen Zhou,<sup>c</sup> Yong Feng Lu<sup>c</sup> and Xiao Cheng Zeng<sup>\*a</sup>

<sup>a</sup>Department of Chemistry, University of Nebraska–Lincoln, Lincoln, Nebraska 68588, United States

<sup>b</sup>Kuang Yaming Honors School, Nanjing University, Nanjing, Jiangsu 210023, China

<sup>c</sup>Department of Electrical and Computer Engineering, University of Nebraska-Lincoln, Lincoln, Nebraska 68588, United States

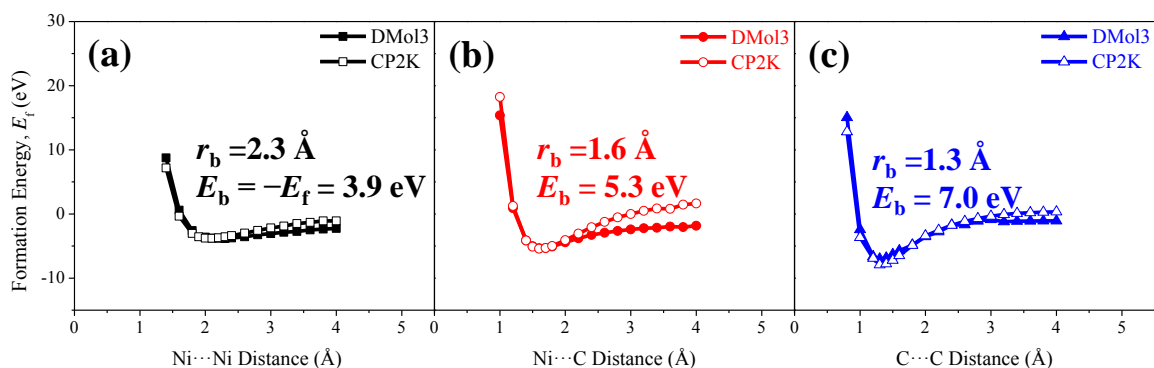

**Fig. S1** Formation energies of Ni···Ni, Ni···C, and C···C as a function of interatomic distance computed using the spin-polarized DFT PBE-D2 method with the double numerical basis set plus polarization (DNP) (implemented in DMol<sup>3</sup> 7.0), and using the PBE-D3 and GWP methods (implemented in CP2K). The minimum of the formation energy curve corresponds to bond distance ( $r_b$ ) and bond energy ( $E_b$ ) between two bonding atoms. Based on the formation energy curves, the interaction strength in Ni-C system can be estimated to follow this general trend, Ni-Ni < Ni-C < C-C, consistent with the cohesive energy trend of Ni < C (see Kittel C. *Introduction to Solid State Physics*; John Wiley & Sons: New York, 1996).

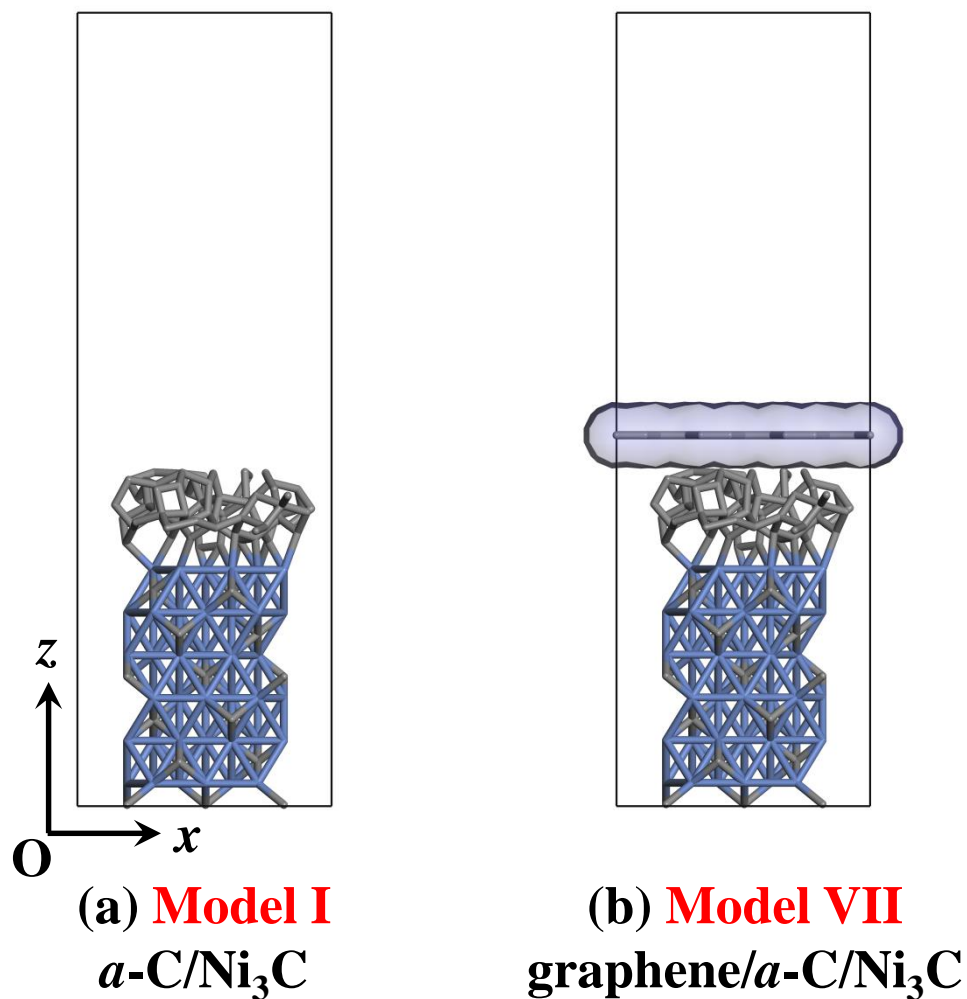

**Fig. S2** Initial configurations of (a) Model I *a-C/Ni<sub>3</sub>C* and (b) Model VII *graphene/a-C/Ni<sub>3</sub>C*. The Ni and C atoms are shown in blue and grey, respectively, and the perfect first graphene layer is also highlighted with purple vdW surface. Both slab models are viewed along the y axis to show the vacuum layer.

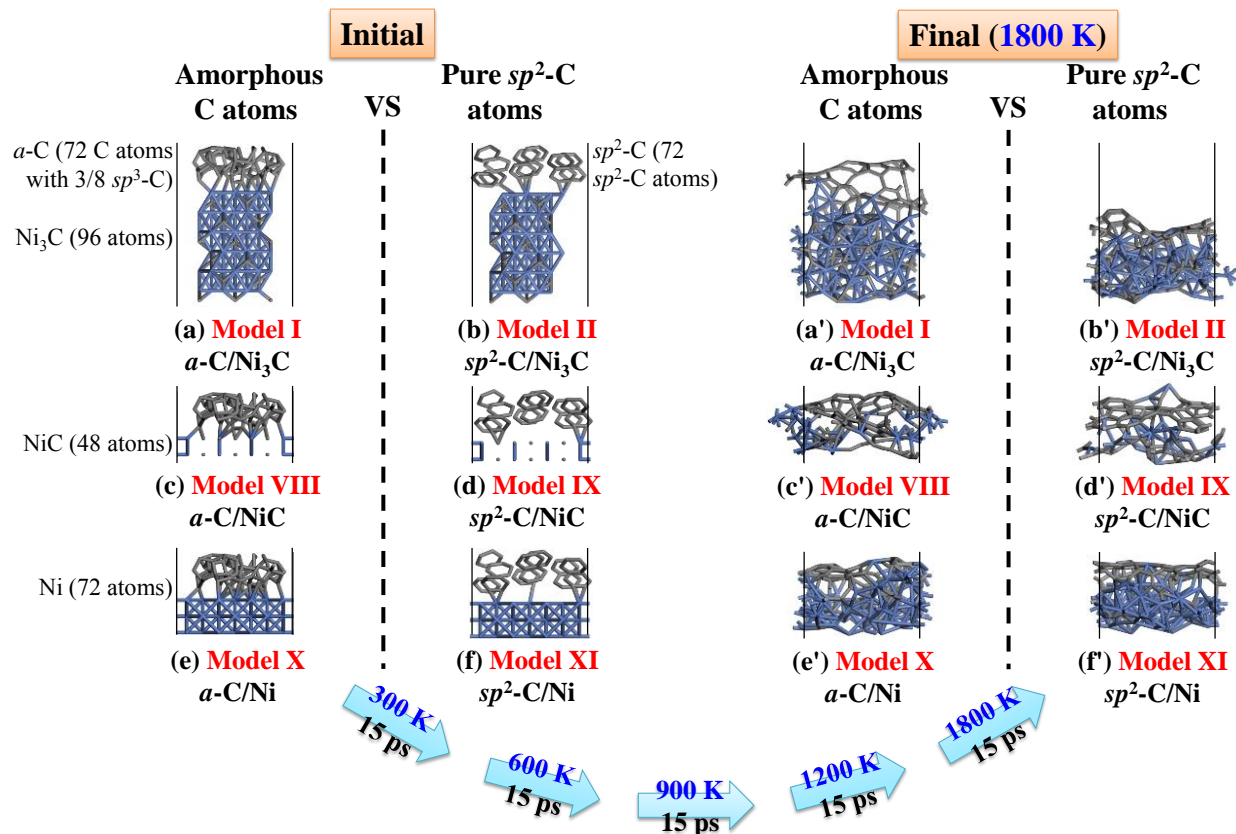

**Fig. S3** Initial (a-f) and final configurations of (a'-f') of Model I  $a\text{-C}/\text{Ni}_3\text{C}$ , Model II  $sp^2\text{-C}/\text{Ni}_3\text{C}$ , Model VIII  $a\text{-C}/\text{NiC}$ , Model IX  $sp^2\text{-C}/\text{NiC}$ , Model X  $a\text{-C}/\text{Ni}$ , and Model XI  $sp^2\text{-C}/\text{Ni}$  based on stepwise temperature increase from 300 K, 600 K, 900 K, 1200 K, to 1800 K every 15 ps in AIMD simulations. The Ni and C atoms are shown in blue and grey, respectively. The number of C atom or Ni atom in each model is also highlighted in insets. All the slab models are viewed along the surface  $y$  axis, and the vacuum layer along the  $z$  axis for each model is cut to highlight reactive solid layers.

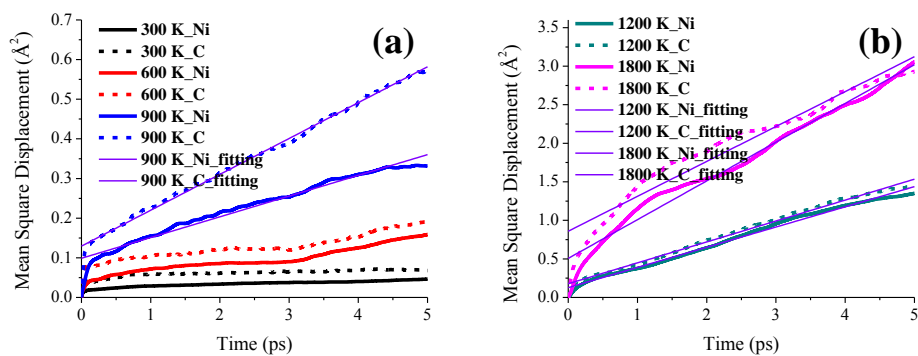

### Model VIII

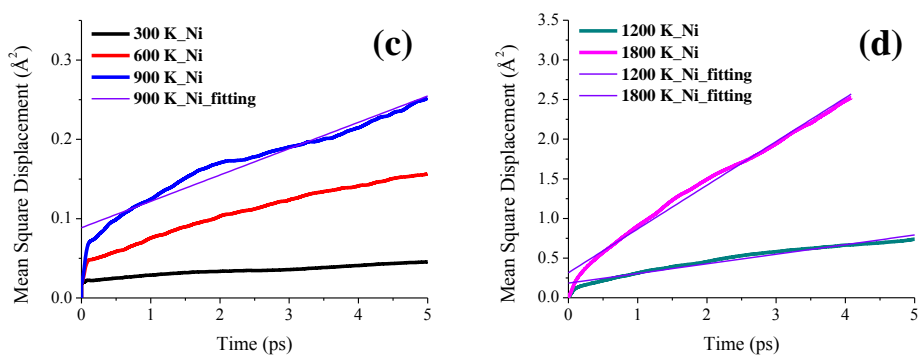

### Model X

**Fig. S4** Variations of mean square displacement (MSD) with time for Ni (solid lines) and C (dashed lines) atoms in NiC layer of Model VIII at (a) 300 K, 600 K, and 900 K and (b) 1200 K and 1800 K, and for Ni atoms in Ni layer of Model X at (c) 300 K, 600 K, and 900 K and (d) 1200 K and 1800 K based on the AIMD simulations. The corresponding linear fitting of the MSD-time curves are in violet.

**Table S1** Computed self-diffusion coefficients,  $D$  (unit:  $\text{cm}^2/\text{s}$ ), of Ni or C atoms in  $\text{Ni}_3\text{C}$  layer of Model I, NiC layer of Model VIII, and Ni layer of Model X at different temperatures (stepwise increase every 15 ps) through linear fitting of MSD-time curves shown in Fig. 2 of the main text and Fig. S4, respectively, on basis of AIMD simulations.

|                                                          | 900 K                | 1200 K               | 1800 K               |
|----------------------------------------------------------|----------------------|----------------------|----------------------|
| <b><math>\text{Ni}_3\text{C}</math> layer of Model I</b> |                      |                      |                      |
| Ni                                                       | $3.3 \times 10^{-7}$ | $6.4 \times 10^{-7}$ | $3.7 \times 10^{-6}$ |
| C                                                        | $4.8 \times 10^{-7}$ | $1.6 \times 10^{-6}$ | $8.6 \times 10^{-6}$ |
| <b>NiC layer of Model VIII</b>                           |                      |                      |                      |
| Ni                                                       | $8.7 \times 10^{-7}$ | $4.4 \times 10^{-6}$ | $8.4 \times 10^{-6}$ |
| C                                                        | $1.5 \times 10^{-6}$ | $4.5 \times 10^{-6}$ | $7.5 \times 10^{-6}$ |
| <b>Ni layer of Model X</b>                               |                      |                      |                      |
| Ni                                                       | $5.5 \times 10^{-7}$ | $2.0 \times 10^{-6}$ | $9.2 \times 10^{-6}$ |

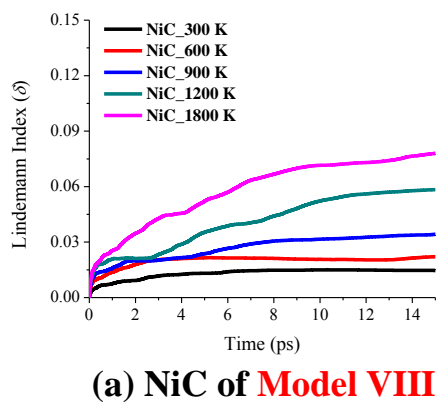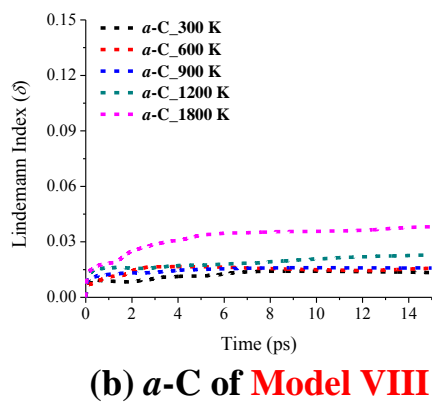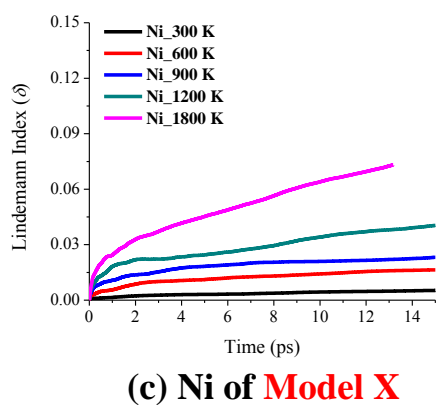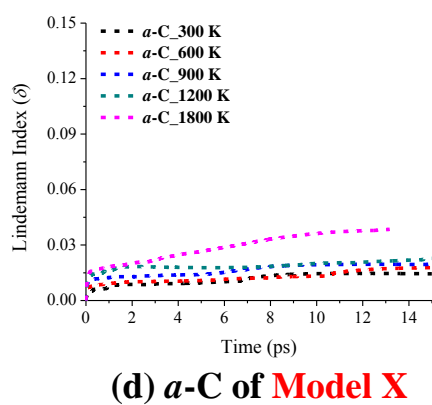

**Fig. S5** Lindemann index ( $\delta$ ) of (a) NiC layer and (b) *a*-C layer in Model VIII and of (c) Ni layer and (d) *a*-C layer in Model X, estimated from the 15-ps AIMD simulations with temperature increase from 300 K, 600 K, 900 K, 1200 K, to 1800 K.
